# Supplementary material for: Anthocyanin Profiles in Flowers of Grape Hyacinth
Source: MDPI journal article supplement (doi:10.3390/molecules22050688), 2017-04-26
Supplement: s1 [file s1]

Supplementary material

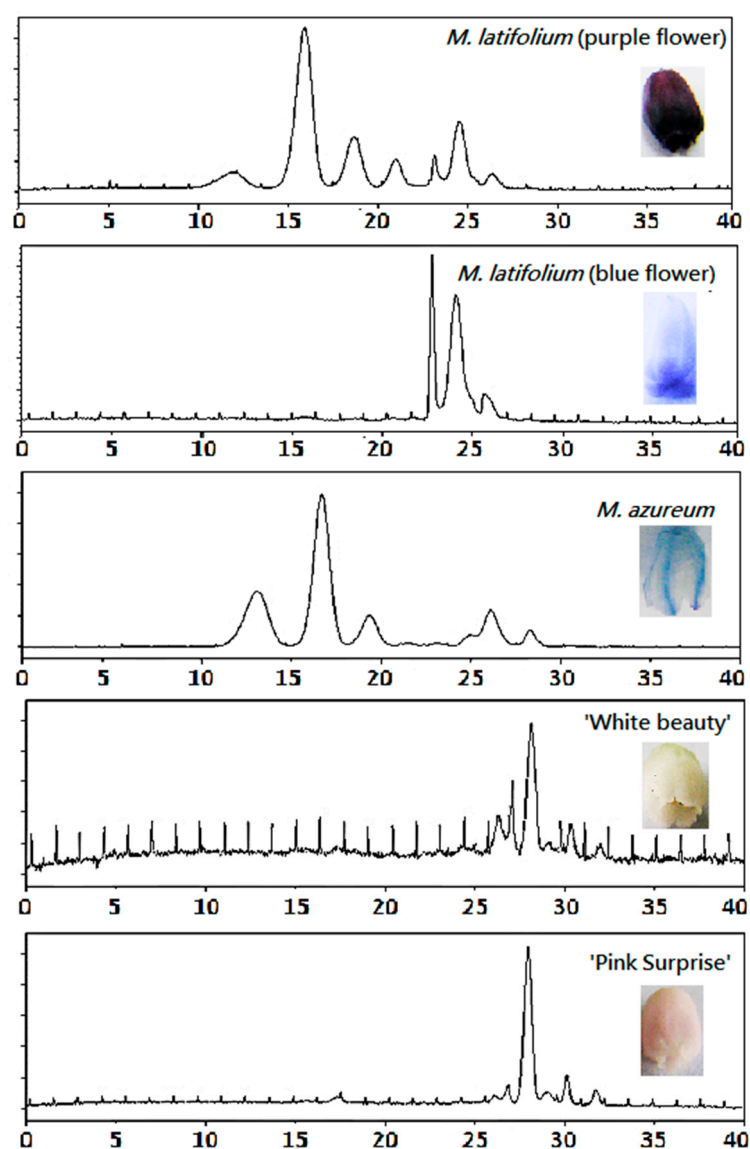

**Figure S1.** HPLC chromatograms of five representative samples of the main color groups.

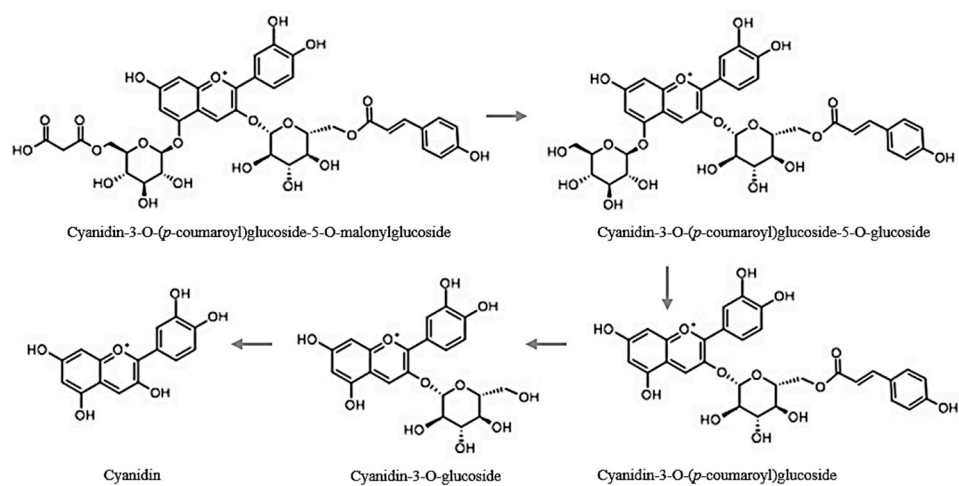

**Figure S2.** An illustrative example facing in detail the structural elucidation of Cyanidin-3-O-(*p*-coumaroyl)glucoside-5-O-malonylglucoside.

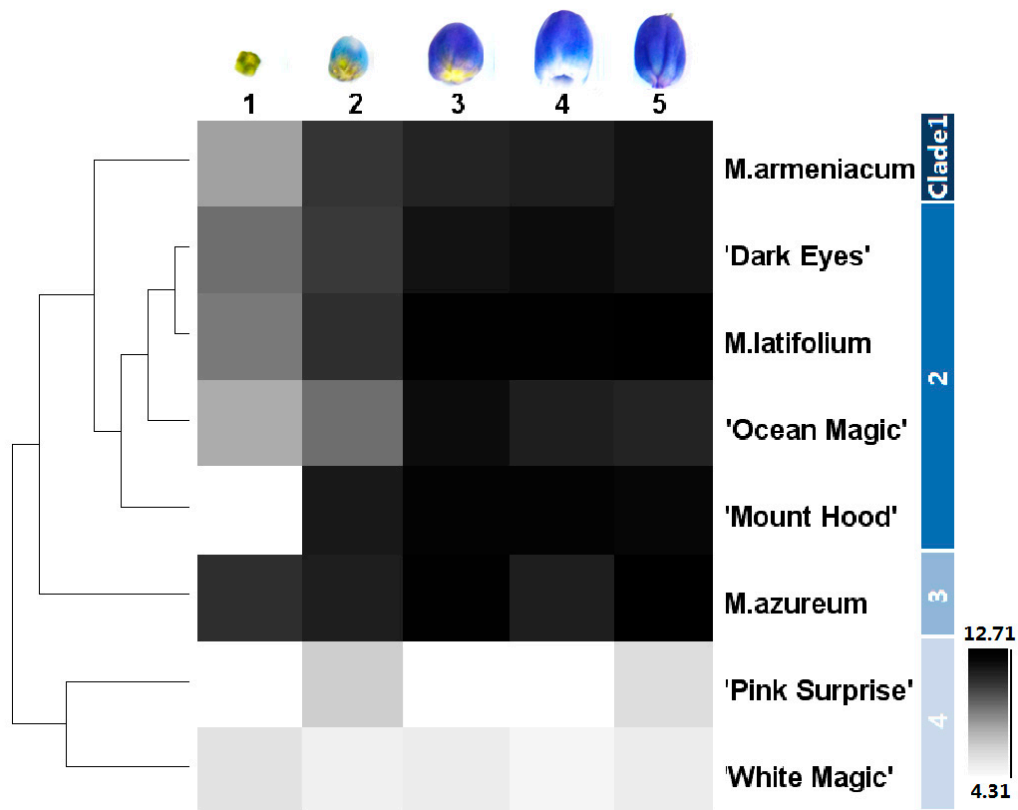

**Figure S3.** Changes in the total anthocyanin content of grape hyacinth tepals during flowering. The average total anthocyanin content of three independent replicates was shown on grids with different gray scale levels representing the relative log2 at different samples, respectively; 1-5 Schematic diagram of five flower developmental stages of grape hyacinth.

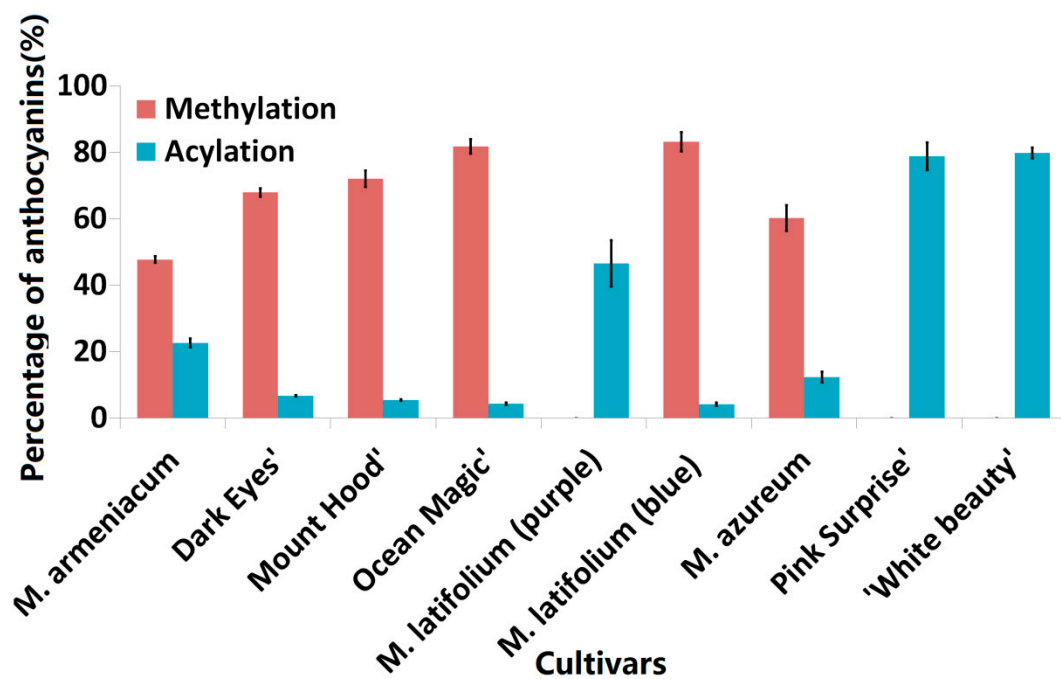

**Figure S4.** Percentage of methylation and acylation in anthocyanins of grape hyacinth. Percentage of methylated and acylated anthocyanins is averaged from three biological replicates. The error bars represent standard deviations.

**Table S1.** Color parameters of grape hyacinth varieties in different flower development stages.

| Cultivars                           | Development Stages | Tepal Color         | C*          | a*/b*  | h            |
|-------------------------------------|--------------------|---------------------|-------------|--------|--------------|
| 'White Magic'                       | 1                  | Greyed-green 191B   | 18.13±1.42  | 0.90   | 131.97±0.36  |
|                                     | 2                  | Yellow-green 149C   | 46.42±16.49 | 0.61   | 121.39±1.53  |
|                                     | 3                  | Green-white 157 D   | 13.86±1.46  | 0.46   | 114.57±0.59  |
|                                     | 4                  | White NN155C        | 3.70±1.88   | 0.40   | 113.08±3.98  |
|                                     | 5                  | White NN155BC       | 6.27±3.61   | 0.35   | 110.79±4.08  |
| 'Mount Hood'                        | 2                  | Violet-blue 97BC    | 17.27±4.64  | 0.25   | 284.36±0.27  |
|                                     | 3                  | Violet-blue 97BC    | 26.70±5.86  | 0.33   | 287.81±3.43  |
|                                     | 4                  | Violet-blue 97A     | 32.52±6.26  | 0.23   | 282.70±1.10  |
|                                     | 5                  | Violet-blue 98BC    | 46.30±5.64  | 0.31   | 287.18±2.81  |
| 'Ocean Magic'                       | 1                  | Greyed Green 194BC  | 30.33±3.99  | 0.62   | 121.87±0.41  |
|                                     | 2                  | Greyed-green 191B   | 18.25±1.34  | 0.90   | 132.00±0.40  |
|                                     | 3                  | Violet-blue 98CD    | 18.04±0.92  | 0.03   | 272.06±0.34  |
|                                     | 4                  | Violet-blue 95C     | 38.21±4.36  | 0.41   | 292.30±0.55  |
|                                     | 5                  | Violet-blue 95 B    | 42.00±4.35  | 0.51   | 296.79±0.17  |
| <i>M. armeniacum</i>                | 1                  | Green 137 ABC       | 23.40±2.28  | 0.99   | 134.85±2.61  |
|                                     | 2                  | Violet-blue 98BC    | 27.90±3.25  | 0.17   | 279.49±3.21  |
|                                     | 3                  | Violet-blue 95AB    | 42.29±5.57  | 0.51   | 296.84±0.19  |
|                                     | 4                  | Violet-blue 95C     | 38.28±10.19 | 0.39   | 290.74±3.50  |
|                                     | 5                  | Violet-blue 95AB    | 40.36±4.54  | 0.47   | 295.41±2.38  |
| 'Dark Eyes'                         | 1                  | Greyed-white 156 B  | 11.30±0.61  | 0.23   | 102.99±0.79  |
|                                     | 2                  | Greyed-green 191B   | 17.63±2.38  | 0.91   | 132.47±1.40  |
|                                     | 3                  | Violet-blue 95 B    | 42.15±5.25  | 0.51   | 296.82±0.14  |
|                                     | 4                  | Violet-blue 98C     | 39.28±9.91  | 0.27   | 283.80±3.49  |
|                                     | 5                  | Violet-blue 96 A    | 42.93±2.41  | 0.54   | 298.48±1.39  |
| <i>M. 'Pink Surprise'</i>           | 2                  | Red-purple 69 B     | 9.35±1.94   | 33.33  | 358.40±0.49  |
|                                     | 3                  | Red-purple 65 D     | 11.28±0.02  | 4.55   | 12.61±0.11   |
|                                     | 4                  | Red-purple 62C      | 25.58±0.02  | 25.00  | 2.27±0.68    |
|                                     | 5                  | Red-purple 65AB     | 33.64±0.02  | 100.00 | 0.42±0.03    |
| <i>M. latifolium</i> (upper flower) | 4                  | Violet-blue 93 B    | 28.32±1.06  | 2.13   | 297.72±0.18  |
| <i>M. latifolium</i> (lower flower) | 2                  | Purple-violet N82 D | 25.92±0.02  | 1.20   | 320.27±0.03  |
|                                     | 3                  | Purple 79 B         | 19.45±0.04  | 1.79   | 330.58±0.04  |
|                                     | 4                  | Purple 79 B         | 31.16±3.02  | 1.79   | 343.09±10.81 |
|                                     | 5                  | Purple N79 A        | 47.59±1.01  | 3.13   | 349.47±0.24  |
| <i>M. azureum</i>                   | 1                  | Green 138AB         | 17.42±1.43  | 0.89   | 132.2±0.43   |
|                                     | 2                  | Violet-blue 98BCD   | 8.57±1.52   | 1.10   | 131.64±0.81  |
|                                     | 3                  | Violet-blue 94AB    | 27.74±3.21  | 0.17   | 137.80±7.70  |
|                                     | 4                  | Violet-blue 96BC    | 17.06±4.66  | 0.24   | 279.13±1.30  |
|                                     | 5                  | Violet-blue 96AB    | 36.97±7.43  | 0.53   | 283.39±3.25  |

Note: Flower colour was determined using RHSCC and recorded as three dimensional CIEL\*a\*b\* values. Flower colour was reproduced by an image editing software (Photoshop) using mean L, a\*, b\* values at all development stages investigated in this study. Chroma C\* represents the brightness of the colour. a\*/b\* represents the hue. h means hue angle. The values are mean ±SD (n=5).
